# Supplementary material for: Potential Antidiabetic Activity of Apis mellifera Propolis Extraction Obtained with Ultrasound
Source: MDPI journal article supplement (doi:10.3390/foods13020348), 2024-01-22
Supplement: s1 [file s1]

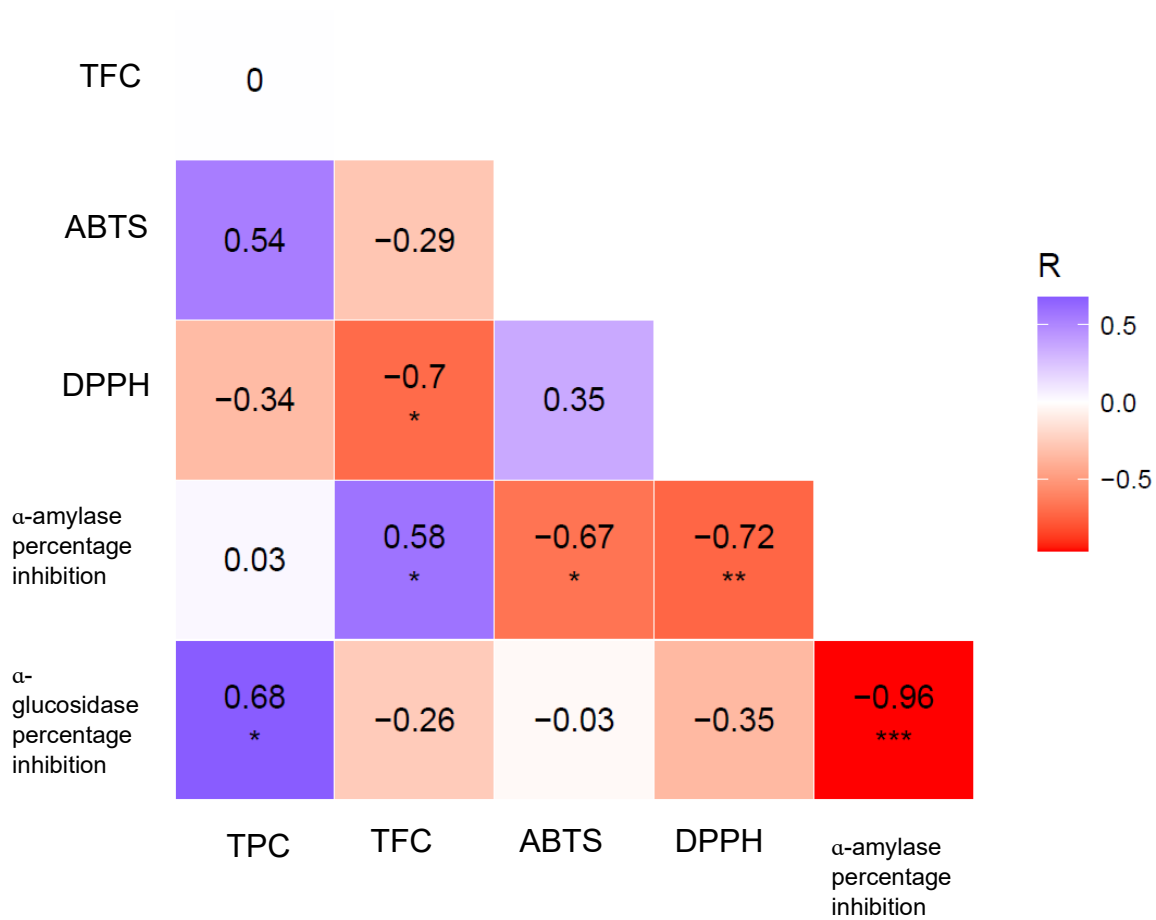

\*p<0.05; \*\*p<0.01; and \*\*\*p<0.001

Figure S1. Pearson correlation coefficients graph of data from analysis carried out on samples from the gastric phase.

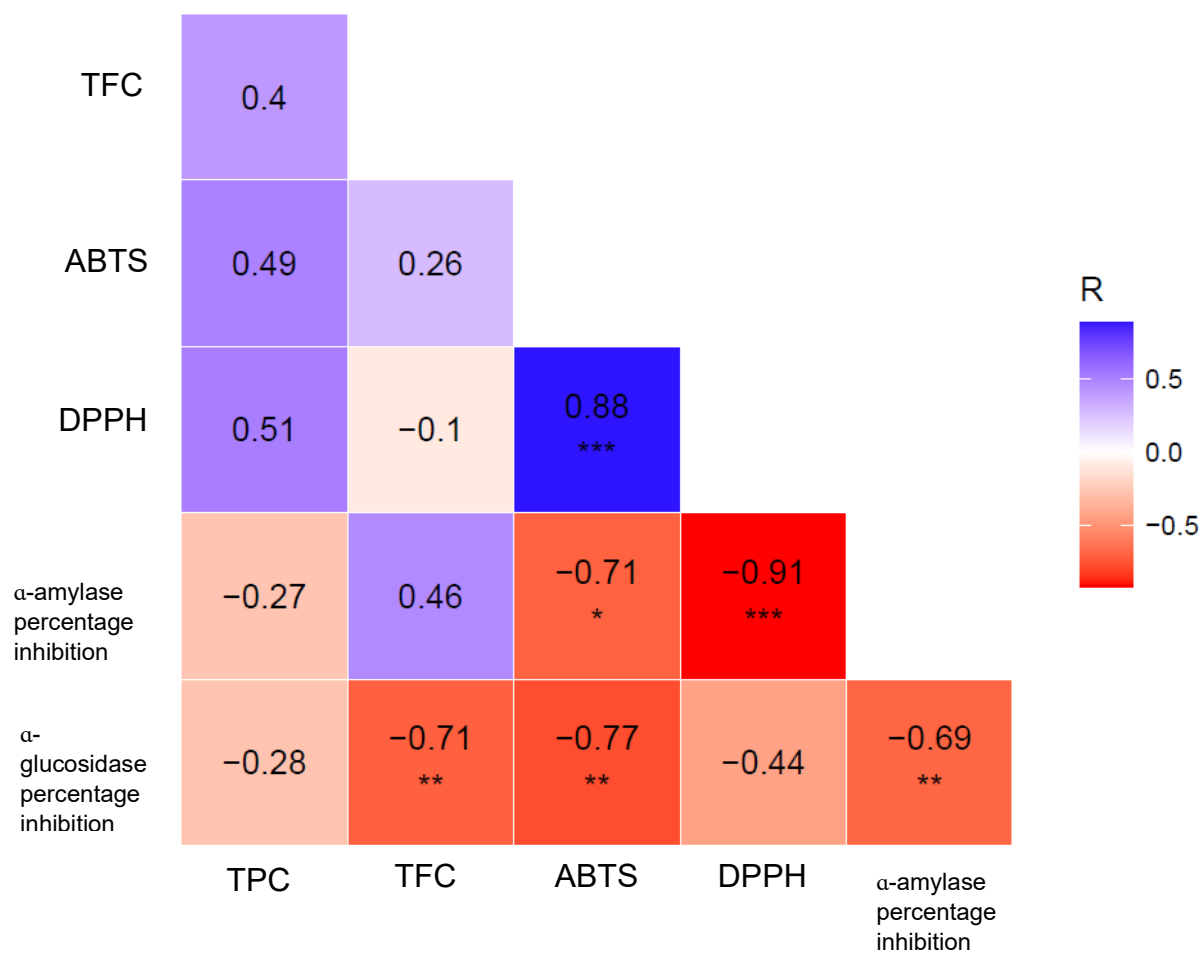

p<0.05; \*\*p<0.01; and \*\*\*p<0.001

Figure S2. Pearson correlation coefficients graph of data from analysis carried out on samples from the intestinal phase.

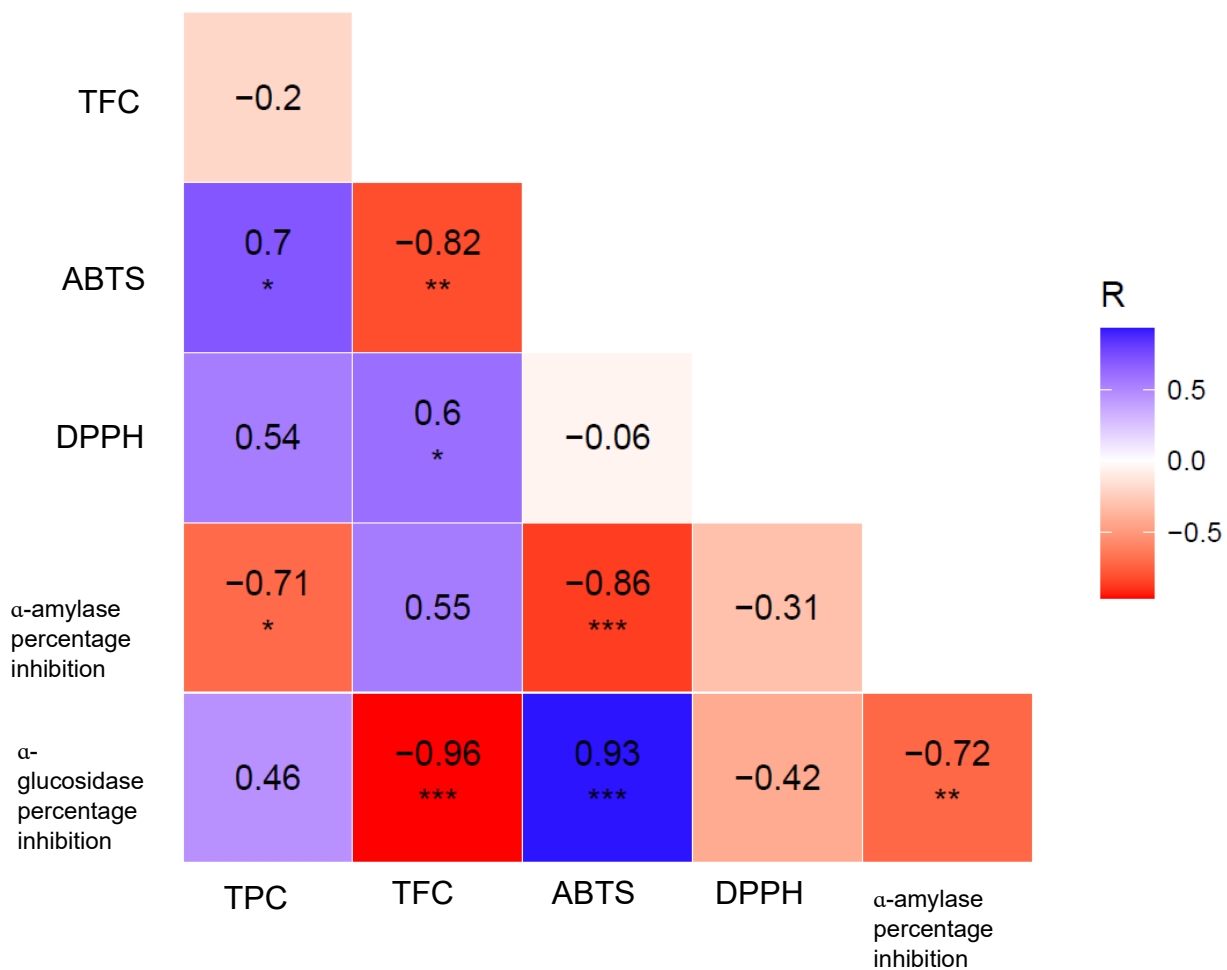

\*p<0.05; \*\*p<0.01; and \*\*\*p<0.001

Figure S3. Pearson correlation coefficients graph of the analyzes carried out on the propolis extracts.
